# Supplementary material for: Organosilane surfactant-directed synthesis of hierarchical mordenite with enhanced catalytic performance in the alkylation of benzene with 1-dodecene
Source: Royal Society of Chemistry journal article supplement (doi:10.1039/d0nj03939j), 2020-01-01
Supplement: d0nj03939j1.pdf [file d0nj03939j1.pdf]

## Supplementary Information

# Organosilane surfactant-directed synthesis of hierarchical mordenite with enhanced catalytic performance in alkylation of benzene with 1-dodecene

Meng-Nan Liu,<sup>a</sup> Yu-Zhao Li,<sup>a</sup> Zhi-Xia Xie,<sup>a</sup> Qing-Qing Hao,<sup>\*,a,b,c</sup> Qun-Xing Luo,<sup>a,b,c</sup> Jianbo Zhang,<sup>a,b,c</sup> Huiyong Chen,<sup>a,b,c</sup> Chengyi Dai<sup>a,b,c</sup> and Xiaoxun Ma<sup>a,b,c</sup>

<sup>a</sup>School of Chemical Engineering, Northwest University, Xi'an, Shaanxi 710069, China

<sup>b</sup>Chemical Engineering Research Center of the Ministry of Education for Advanced Use Technology of Shanbei Energy, Xi'an, Shaanxi 710069, China

<sup>c</sup>International Science & Technology Cooperation Base of MOST for Clean Utilization of Hydrocarbon Resources; Collaborative Innovation Center for Development of Energy and Chemical Industry in Northern Shaanxi, Xi'an, Shaanxi 710069, China

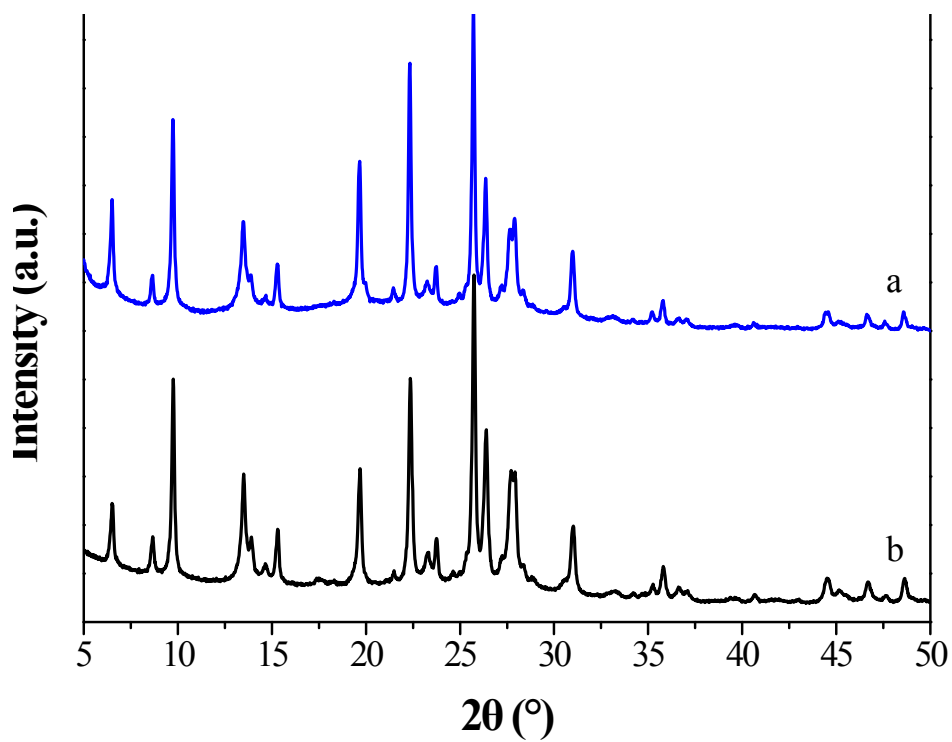

**Figure S1.** XRD patterns of *h*-MOR-0.05 synthesized with different conditions. (a) 6 d, aging temperature: 35 °C, (b) 10 d, aging temperature: room temperature (about 25 °C)
